# Supplementary material
Source: publisher site journal article supplement (http://content.karger.com/ProdukteDB/miscArchiv/000/078/195/appendix.pdf)
Supplement: Supplementary file 2 [file appendix.pdf]

## **Supplementary material. I. Dataset of 2-cell library identified transcripts**

The dataset, currently in Microsoft Excel format, may be downloaded from:  
<ftp://ftp.informatics.jax.org/pub/informatics/datasets/index.html>

**Supplementary material. II. Distribution of BLAST hits in the mouse genome assembly<sup>a</sup> for the 2-cell and somatically expressed genes**

Genes expressed only in somatic tissues

| Gene symbol          | CDS length | Match to a gene | Match to a paralog | Contiguous sequence match, >80% aligned | Contiguous sequence match, <80% aligned |
|----------------------|------------|-----------------|--------------------|-----------------------------------------|-----------------------------------------|
| <i>Ahsg</i>          | 1038       | 1               | 0                  | 0                                       | 0                                       |
| <i>Alb1</i>          | 1827       | 1               | 2                  | 0                                       | 0                                       |
| <i>Amy2</i>          | 1527       | 1               | 1                  | 0                                       | 0                                       |
| <i>Apoa4</i>         | 1185       | 1               | 0                  | 3                                       | 36                                      |
| <i>Car3</i>          | 1067       | 1               | 3                  | 0                                       | 0                                       |
| <i>Cryaa</i>         | 591        | 1               | 1                  | 1                                       | 1                                       |
| <i>Csnb</i>          | 696        | 1               | 0                  | 0                                       | 3                                       |
| <i>Eno1</i>          | 1305       | 1               | 9                  | 9                                       | 8                                       |
| <i>Fgb</i>           | 1446       | 1               | 3                  | 0                                       | 0                                       |
| <i>Fgfr2</i>         | 2466       | 1               | 23                 | 0                                       | 5                                       |
| <i>Gnat1</i>         | 1053       | 1               | 9                  | 1                                       | 3                                       |
| <i>Gpx1</i>          | 606        | 1               | 2                  | 1                                       | 0                                       |
| <i>Hbb-b2</i>        | 444        | 1               | 5                  | 0                                       | 0                                       |
| <i>Hp</i>            | 1044       | 1               | 0                  | 0                                       | 0                                       |
| <i>Hpxn</i>          | 1383       | 1               | 0                  | 0                                       | 1                                       |
| <i>Kap</i>           | 366        | 1               | 0                  | 0                                       | 5                                       |
| <i>Klk6</i>          | 786        | 1               | 28                 | 0                                       | 0                                       |
| <i>Knng</i>          | 1299       | 1               | 1                  | 0                                       | 2                                       |
| <i>Lalba</i>         | 432        | 1               | 0                  | 0                                       | 0                                       |
| <i>Lao1</i>          | 1572       | 1               | 2                  | 0                                       | 0                                       |
| <i>MGC37245</i>      | 1728       | 1               | 4                  | 0                                       | 1                                       |
| <i>Mup1</i>          | 543        | 1               | 7                  | 0                                       | 1                                       |
| <i>Pah</i>           | 1362       | 1               | 3                  | 0                                       | 1                                       |
| <i>Pou2af1</i>       | 771        | 1               | 0                  | 1                                       | 1                                       |
| <i>Rbp4</i>          | 606        | 1               | 0                  | 0                                       | 0                                       |
| <i>Rom1</i>          | 1056       | 1               | 0                  | 0                                       | 0                                       |
| <i>Sag</i>           | 1212       | 1               | 2                  | 0                                       | 1                                       |
| <i>Scp2</i>          | 432        | 1               | 1                  | 3                                       | 0                                       |
| <i>Sema4a</i>        | 2283       | 1               | 3                  | 0                                       | 0                                       |
| <i>Sepp1</i>         | 1143       | 1               | 0                  | 0                                       | 1                                       |
| <i>Slc13a3</i>       | 1803       | 1               | 5                  | 2                                       | 33                                      |
| <i>Slc2a4</i>        | 1533       | 1               | 4                  | 0                                       | 1                                       |
| <i>Spi1-1</i>        | 1242       | 1               | 27                 | 0                                       | 2                                       |
| <i>Syp</i>           | 927        | 1               | 1                  | 0                                       | 0                                       |
| <i>Thrsp</i>         | 453        | 1               | 0                  | 0                                       | 0                                       |
| <i>Tiarp-pending</i> | 1413       | 1               | 1                  | 0                                       | 0                                       |
| <i>Trfr2</i>         | 2397       | 1               | 1                  | 0                                       | 1                                       |
| <i>Tr</i>            | 444        | 1               | 0                  | 0                                       | 0                                       |
| <i>Umod</i>          | 1929       | 1               | 3                  | 0                                       | 1                                       |
| <i>Vtn</i>           | 1437       | 1               | 0                  | 0                                       | 0                                       |

2-cell-stage expressed genes

| Gene symbol        | CDS length | Match to a gene | Match to a paralog | Contiguous sequence match, >80% aligned | Contiguous sequence match, <80% aligned |
|--------------------|------------|-----------------|--------------------|-----------------------------------------|-----------------------------------------|
| <i>Ask-pending</i> | 1992       | 1               | 0                  | 0                                       | 4                                       |
| <i>Bmi1</i>        | 750        | 1               | 6                  | 0                                       | 0                                       |
| <i>Btg4</i>        | 753        | 1               | 1                  | 0                                       | 1                                       |
| <i>Catnb</i>       | 2346       | 1               | 1                  | 0                                       | 0                                       |
| <i>Ccne1</i>       | 1476       | 1               | 1                  | 0                                       | 0                                       |
| <i>Cdr2</i>        | 1368       | 1               | 1                  | 4                                       | 32                                      |
| <i>Clptm1</i>      | 1548       | 1               | 0                  | 0                                       | 1                                       |
| <i>Cnih</i>        | 435        | 1               | 3                  | 0                                       | 0                                       |
| <i>Ctsl</i>        | 1005       | 1               | 6                  | 0                                       | 3                                       |
| <i>Dnajb9</i>      | 669        | 1               | 2                  | 1                                       | 4                                       |
| <i>Ebp2</i>        | 921        | 1               | 0                  | 0                                       | 1                                       |
| <i>Ei24</i>        | 1077       | 1               | 0                  | 0                                       | 2                                       |
| <i>Eif4g2</i>      | 2724       | 1               | 1                  | 0                                       | 1                                       |
| <i>Gtl6</i>        | 3312       | 1               | 0                  | 0                                       | 1                                       |
| <i>Hspa5</i>       | 1968       | 1               | 6                  | 9                                       | 29                                      |
| <i>Ingl</i>        | 840        | 1               | 3                  | 0                                       | 7                                       |
| <i>Maid</i>        | 933        | 1               | 0                  | 0                                       | 0                                       |
| <i>Map1lc3</i>     | 378        | 1               | 1                  | 7                                       | 1                                       |
| <i>Nsep1</i>       | 966        | 1               | 2                  | 11                                      | 24                                      |
| <i>Oas1d</i>       | 1086       | 1               | 9                  | 2                                       | 1                                       |
| <i>Odc</i>         | 1386       | 1               | 5                  | 9                                       | 6                                       |
| <i>Pa2g4</i>       | 1185       | 1               | 0                  | 1                                       | 4                                       |
| <i>Ppm1a</i>       | 1149       | 1               | 1                  | 1                                       | 4                                       |
| <i>Ppp1r2</i>      | 621        | 1               | 2                  | 6                                       | 12                                      |
| <i>Prps1</i>       | 957        | 1               | 3                  | 2                                       | 3                                       |
| <i>Psmc5</i>       | 1515       | 1               | 0                  | 0                                       | 1                                       |
| <i>Ptbp1</i>       | 1584       | 1               | 2                  | 1                                       | 9                                       |
| <i>Sat</i>         | 516        | 1               | 1                  | 2                                       | 1                                       |
| <i>Set</i>         | 870        | 1               | 3                  | 19                                      | 30                                      |
| <i>Siah2</i>       | 978        | 1               | 2                  | 2                                       | 1                                       |
| <i>Slc34a2</i>     | 2094       | 1               | 2                  | 0                                       | 26                                      |
| <i>Spin</i>        | 789        | 1               | 0                  | 6                                       | 1                                       |
| <i>Sui1-rs1</i>    | 342        | 1               | 1                  | 26                                      | 23                                      |
| <i>Timm17a</i>     | 516        | 1               | 1                  | 4                                       | 2                                       |
| <i>Tpt1</i>        | 519        | 1               | 0                  | 11                                      | 16                                      |
| <i>Ttrap</i>       | 1113       | 1               | 0                  | 0                                       | 2                                       |
| <i>Ube2d2</i>      | 444        | 1               | 4                  | 23                                      | 15                                      |
| <i>Vcp</i>         | 2421       | 1               | 8                  | 1                                       | 5                                       |
| <i>Xpo1</i>        | 1695       | 1               | 0                  | 0                                       | 8                                       |
| <i>Yap</i>         | 1419       | 1               | 3                  | 0                                       | 15                                      |

<sup>a</sup> Mouse Genome Sequencing Consortium. Initial sequencing and comparative analysis of the mouse genome. *Nature* 420:520-562 (2002).

### Supplementary material. III. Comparison of the genes from the 2-cell library with the dataset of “stemness” genes expressed in three types of stem cells<sup>a</sup>.

#### A. List of “stemness” genes found in the 2-cell library.

| Gene symbol          | Description                                                                         |
|----------------------|-------------------------------------------------------------------------------------|
| <i>0610009E22Rik</i> | RIKEN cDNA 0610009E22 gene                                                          |
| <i>0610013E23Rik</i> | RIKEN cDNA 0610013E23 gene                                                          |
| <i>1110007M04Rik</i> | RIKEN cDNA 1110007M04 gene                                                          |
| <i>1110008B24Rik</i> | RIKEN cDNA 1110008B24 gene                                                          |
| <i>1200014I03Rik</i> | RIKEN cDNA 1200014I03 gene                                                          |
| <i>1300007B12Rik</i> | RIKEN cDNA 1300007B12 gene                                                          |
| <i>1500011J06Rik</i> | RIKEN cDNA 1500011J06 gene                                                          |
| <i>1500016H10Rik</i> | RIKEN cDNA 1500016H10 gene                                                          |
| <i>2310006I24Rik</i> | RIKEN cDNA 2310006I24 gene                                                          |
| <i>2410005K20Rik</i> | RIKEN cDNA 2410005K20 gene                                                          |
| <i>2410080P20Rik</i> | RIKEN cDNA 2410080P20 gene                                                          |
| <i>2410141K03Rik</i> | RIKEN cDNA 2410141K03 gene                                                          |
| <i>2610003B19Rik</i> | RIKEN cDNA 2610003B19 gene                                                          |
| <i>2610318G08Rik</i> | RIKEN cDNA 2610318G08 gene                                                          |
| <i>2610511E03Rik</i> | RIKEN cDNA 2610511E03 gene                                                          |
| <i>2700079K05Rik</i> | RIKEN cDNA 2700079K05 gene                                                          |
| <i>3110065C23Rik</i> | RIKEN cDNA 3110065C23 gene; expressed sequence AA408566                             |
| <i>4432405K22Rik</i> | RIKEN cDNA 4432405K22 gene                                                          |
| <i>5730409F23Rik</i> | RIKEN cDNA 5730409F23 gene                                                          |
| <i>5730591C18Rik</i> | RIKEN cDNA 5730591C18 gene                                                          |
| <i>5830482G23Rik</i> | RIKEN cDNA 5830482G23 gene                                                          |
| <i>6230400O18Rik</i> | RIKEN cDNA 6230400O18 gene                                                          |
| <i>AA407558</i>      | expressed sequence AA407558; gene trap ankyrin repeat (Gtar-pending)                |
| <i>AI327140</i>      | Mus musculus, clone IMAGE:3491909, mRNA, partial cds; "expressed sequence AI327140" |
| <i>AL023001</i>      | Mus musculus, clone IMAGE:4504751, mRNA, partial cds; "expressed sequence AL023001" |
| <i>Arih1</i>         | ariadne ubiquitin-conjugating enzyme E2-binding protein homolog 1 Drosophila        |
| <i>Bach1</i>         | BTB and CNC homology 1                                                              |
| <i>BC003993</i>      | cDNA sequence BC003993                                                              |
| <i>Chd1</i>          | chromodomain helicase DNA binding protein 1                                         |
| <i>Cops4</i>         | COP9 (constitutive photomorphogenic) homolog, subunit 4 (Arabidopsis thaliana)      |
| <i>Cops7a</i>        | COP9 (constitutive photomorphogenic) homolog, subunit 7a (Arabidopsis thaliana)     |
| <i>Crsp3</i>         | cofactor required for Sp1 transcriptional activation, subunit 3 (130kD)             |
| <i>D5Ertd363e</i>    | RIKEN cDNA 2700038B03 gene; "D5Ertd363e"                                            |
| <i>D5Ertd689e</i>    | DNA segment, Chr 5, ERATO Doi 689, expressed                                        |
| <i>D7Ertd373e</i>    | DNA segment Chr 7 ERATO Doi 373 expressed                                           |
| <i>Dnajb6</i>        | DnaJ (Hsp40) homolog, subfamily B, member 6                                         |
| <i>Eif4g2</i>        | eukaryotic translation initiation factor 4 gamma 2                                  |
| <i>Etl1</i>          | enhancer trap locus 1                                                               |
| <i>Fbxo8</i>         | f-box only protein 8                                                                |

|                        |                                                                                                                             |
|------------------------|-----------------------------------------------------------------------------------------------------------------------------|
| <i>Gfer</i>            | growth factor, erv1 ( <i>S. cerevisiae</i> )-like (augmenter of liver regeneration)                                         |
| <i>Gnb1</i>            | guanine nucleotide binding protein, beta 1                                                                                  |
| <i>Itga6</i>           | integrin alpha 6                                                                                                            |
| <i>Kif2</i>            | kinesin heavy chain member 2                                                                                                |
| <i>Kras2</i>           | Kirsten rat sarcoma oncogene 2 expressed                                                                                    |
| <i>Laptm4a</i>         | lysosomal-associated protein transmembrane 4A                                                                               |
| <i>Mki67ip</i>         | Mki67 (FHA domain) interacting nucleolar phosphoprotein                                                                     |
| <i>Mpdu1</i>           | mannose-P-dolichol utilization defect 1                                                                                     |
| <i>Ncoa6ip</i>         | Nuclear receptor coactivator 6 interacting protein                                                                          |
| <i>Nyren18-pending</i> | NY-REN-18 antigen                                                                                                           |
| <i>Pdcd2</i>           | programmed cell death 2                                                                                                     |
| <i>Plunc</i>           | palate lung and nasal epithelium expressed transcript                                                                       |
| <i>Ppp1r2</i>          | protein phosphatase 1, regulatory (inhibitor) subunit 2                                                                     |
| <i>Psm11</i>           | proteasome (prosome, macropain) 26S subunit, non-ATPase, 11                                                                 |
| <i>Ptpn2</i>           | protein tyrosine phosphatase non-receptor type 2                                                                            |
| <i>Pyp</i>             | pyrophosphatase; also: "2010317E03Rik"                                                                                      |
| <i>Qprs</i>            | glutamine-proline-tRNA synthetase                                                                                           |
| <i>Rabggtb</i>         | RAB geranylgeranyl transferase, b subunit                                                                                   |
| <i>Rad23b</i>          | RAD23b homolog ( <i>S. cerevisiae</i> )                                                                                     |
| <i>Rnf4</i>            | ring finger protein 4                                                                                                       |
| <i>Ryk</i>             | receptor-like tyrosine kinase                                                                                               |
| <i>Sh3d19</i>          | SH3 domain protein D19                                                                                                      |
| <i>Snrp1c</i>          | U1 small nuclear ribonucleoprotein 1C                                                                                       |
| <i>Socs2</i>           | suppressor of cytokine signaling 2                                                                                          |
| <i>Strn3</i>           | striatin, calmodulin binding protein 3                                                                                      |
| <i>Thpp2</i>           | tripeptidyl peptidase II                                                                                                    |
| <i>Trif-pending</i>    | Trif gene                                                                                                                   |
| <i>Ube2d2</i>          | ubiquitin-conjugating enzyme E2D 2                                                                                          |
| <i>Uchrp</i>           | ubiquitin c-terminal hydrolase related polypeptide                                                                          |
| <i>Umps</i>            | uridine monophosphate synthetase                                                                                            |
| <i>Usp9x</i>           | ubiquitin specific protease 9, X chromosome                                                                                 |
| <i>Wtap</i>            | Wilms' tumour 1-associating protein                                                                                         |
| <i>Xpo1</i>            | exportin 1, CRM1 homolog (yeast)                                                                                            |
| <i>Yap</i>             | yes-associated protein, 65 kDa                                                                                              |
| <i>Ywhah</i>           | tyrosine 3-monooxygenase/tryptophan 5-monooxygenase activation protein, eta polypeptide                                     |
| <i>LOC218397</i>       | LOC218397: Ras GTPase-activating protein 1 (GTPase-activating protein) (GAP) (Ras p21 protein activator) (p120GAP) (RasGAP) |

---

**B. List of “stemness” genes NOT found in the 2-cell library.**

---

| Gene symbol          | Description                |
|----------------------|----------------------------|
| <i>1110002O23Rik</i> | RIKEN cDNA 1110002O23 gene |
| <i>1110004L07Rik</i> | RIKEN cDNA 1110004L07 gene |
| <i>1110054G21Rik</i> | RIKEN cDNA 1110054G21 gene |
| <i>1210001E11Rik</i> | RIKEN cDNA 1210001E11 gene |
| <i>1700016A15Rik</i> | RIKEN cDNA 1700016A15 gene |
| <i>1700030G05Rik</i> | RIKEN cDNA 1700030G05 gene |
| <i>1810009A15Rik</i> | RIKEN cDNA 1810009A15 gene |
| <i>1810012N18Rik</i> | RIKEN cDNA 1810012N18 gene |

|                      |                                                                                                                                                                                                    |
|----------------------|----------------------------------------------------------------------------------------------------------------------------------------------------------------------------------------------------|
| <i>2010002H18Rik</i> | RIKEN cDNA 2010002H18 gene                                                                                                                                                                         |
| <i>2010319C14Rik</i> | RIKEN cDNA 2010319C14 gene                                                                                                                                                                         |
| <i>2310044F10Rik</i> | RIKEN cDNA 2310044F10 gene                                                                                                                                                                         |
| <i>2410001E19Rik</i> | RIKEN cDNA 2410001E19 gene                                                                                                                                                                         |
| <i>2410008J01Rik</i> | RIKEN cDNA 2410008J01 gene                                                                                                                                                                         |
| <i>2410012M04Rik</i> | RIKEN cDNA 2410012M04 gene                                                                                                                                                                         |
| <i>2410015N17Rik</i> | RIKEN cDNA 2410015N17 gene                                                                                                                                                                         |
| <i>2410017I18Rik</i> | RIKEN cDNA 2410017I18 gene                                                                                                                                                                         |
| <i>2410022L05Rik</i> | RIKEN cDNA 2410022L05 gene                                                                                                                                                                         |
| <i>2410091N08Rik</i> | RIKEN cDNA 2410091N08 gene                                                                                                                                                                         |
| <i>2500001H09Rik</i> | Mus musculus, clone IMAGE:3481943, mRNA, partial cds;<br>RIKEN cDNA 2500001H09 gene; "expressed sequence<br>C77803"                                                                                |
| <i>2610024N01Rik</i> | RIKEN cDNA 2610024N01 gene                                                                                                                                                                         |
| <i>2610031L17Rik</i> | RIKEN cDNA 2610031L17 gene                                                                                                                                                                         |
| <i>2700084L22Rik</i> | RIKEN cDNA 2700084L22 gene                                                                                                                                                                         |
| <i>2810453H10Rik</i> | RIKEN cDNA 2810453H10 gene                                                                                                                                                                         |
| <i>3732413I11Rik</i> | RIKEN cDNA 3732413I11 gene                                                                                                                                                                         |
| <i>3830408P06Rik</i> | RIKEN cDNA 3830408P06 gene                                                                                                                                                                         |
| <i>4933428G09Rik</i> | RIKEN cDNA 4933428G09 gene                                                                                                                                                                         |
| <i>5730599O09Rik</i> | RIKEN cDNA 5730599O09 gene                                                                                                                                                                         |
| <i>5830427H10Rik</i> | RIKEN cDNA 5830427H10 gene                                                                                                                                                                         |
| <i>6330503C17Rik</i> | RIKEN cDNA 6330503C17 gene                                                                                                                                                                         |
| <i>AA408880</i>      | expressed sequence AA408880                                                                                                                                                                        |
| <i>AA409185</i>      | expressed sequence AA409185                                                                                                                                                                        |
| <i>Abcb1b</i>        | ATP-binding cassette, sub-family B (MDR/TAP), member 1B                                                                                                                                            |
| <i>Acadm</i>         | acetyl-Coenzyme A dehydrogenase medium chain                                                                                                                                                       |
| <i>Adam9</i>         | a disintegrin and metalloproteinase domain 9 (meltrin gamma)                                                                                                                                       |
| <i>AI115446</i>      | expressed sequence AI115446                                                                                                                                                                        |
| <i>AI316867</i>      | expressed sequence AI316867                                                                                                                                                                        |
| <i>AI504353</i>      | expressed sequence AI504353                                                                                                                                                                        |
| <i>AI507170</i>      | expressed sequence AI507170                                                                                                                                                                        |
| <i>AI643885</i>      | Mus musculus, Similar to solute carrier family 7 (cationic<br>amino acid transporter, y+ system), member 6, clone<br>MGC:37035 IMAGE:4949962, mRNA, complete cds;<br>"expressed sequence AI643885" |
| <i>AW111866</i>      | expressed sequence AW111866                                                                                                                                                                        |
| <i>AW214031</i>      | expressed sequence AW214031                                                                                                                                                                        |
| <i>AW549877</i>      | "expressed sequence AW549877", "expressed sequence<br>AI195826"                                                                                                                                    |
| <i>Axot</i>          | axotrophin                                                                                                                                                                                         |
| <i>BB128963</i>      | Mus musculus, clone IMAGE:3964696, mRNA, partial cds;<br>"expressed sequence BB128963"                                                                                                             |
| <i>Bysl</i>          | bystin-like                                                                                                                                                                                        |
| <i>C78212</i>        | expressed sequence C78212                                                                                                                                                                          |
| <i>Cbr3</i>          | carbonyl reductase 3                                                                                                                                                                               |
| <i>Ccnd1</i>         | cyclin D1                                                                                                                                                                                          |
| <i>Cdkap1</i>        | CDK2 cyclin-dependent kinase 2 associated protein 1                                                                                                                                                |
| <i>Cdkn1a</i>        | cyclin-dependent kinase inhibitor 1A (P21)                                                                                                                                                         |
| <i>Cenpc</i>         | centromere autoantigen C                                                                                                                                                                           |
| <i>Cpr2-pending</i>  | cell cycle progression 2 protein                                                                                                                                                                   |
| <i>Cpxm1</i>         | carboxypeptidase X 1 (M14 family)                                                                                                                                                                  |
| <i>Crtap</i>         | cartilage associated protein                                                                                                                                                                       |
| <i>Cttn</i>          | cortactin                                                                                                                                                                                          |
| <i>D10Wsu102e</i>    | DNA segment Chr 10 Wayne State University 102 expressed                                                                                                                                            |
| <i>D11Wsu78e</i>     | DNA segment Chr 11 Wayne State University 78 expressed                                                                                                                                             |

|                      |                                                                                      |
|----------------------|--------------------------------------------------------------------------------------|
| <i>D12Ert7e</i>      | DNA segment Chr 12 ERATO Doi 7 expressed                                             |
| <i>D16Bwg1547e</i>   | DNA segment Chr 16 Brigham Women s Genetics 1547 expressed                           |
| <i>D17Ert7e</i>      | DNA segment Chr 17 ERATO Doi 197 expressed                                           |
| <i>D7Wsu87e</i>      | DNA segment, Chr 7, Wayne State University 87, expressed                             |
| <i>Eif4ebp1</i>      | eukaryotic translation initiation factor 4E binding protein 1                        |
| <i>Eplin-pending</i> | epithelial protein lost in neoplasm                                                  |
| <i>Erc5</i>          | excision repair cross-complementing rodent repair deficiency complementation group 5 |
| <i>F2r</i>           | coagulation factor II (thrombin) receptor                                            |
| <i>Fhl1</i>          | four and a half LIM domains 1                                                        |
| <i>Fkbp9</i>         | FK506 binding protein 9                                                              |
| <i>Gab1</i>          | growth factor receptor bound protein 2-associated protein 1                          |
| <i>Gas2</i>          | growth arrest specific 2                                                             |
| <i>Gcat</i>          | glycine C-acetyltransferase 2-amino-3-ketobutyrate-coenzyme A ligase                 |
| <i>Gclm</i>          | glutamate-cysteine ligase, modifier subunit                                          |
| <i>Ghr</i>           | Growth hormone receptor                                                              |
| <i>Gsta4</i>         | glutathione S-transferase, alpha 4                                                   |
| <i>Hrsp12</i>        | heat-responsive protein 12                                                           |
| <i>Hspa11</i>        | heat shock 70kD protein 1-like                                                       |
| <i>Hspa4</i>         | heat shock 70 kDa protein 4                                                          |
| <i>Itgb1</i>         | integrin beta 1 (fibronectin receptor beta)                                          |
| <i>Kcnab3</i>        | potassium voltage-gated channel, shaker-related subfamily, beta member 3             |
| <i>Kdt1</i>          | kidney cell line derived transcript 1                                                |
| <i>Lce-pending</i>   | long chain fatty acyl elongase                                                       |
| <i>Madh1</i>         | MAD homolog 1 (Drosophila)                                                           |
| <i>Madh2</i>         | MAD homolog 2 (Drosophila)                                                           |
| <i>Mdf1</i>          | MyoD family inhibitor                                                                |
| <i>Mrp17</i>         | mitochondrial ribosomal protein L17                                                  |
| <i>Mrp13</i>         | mitochondrial ribosomal protein L3                                                   |
| <i>Mrp134</i>        | mitochondrial ribosomal protein L34                                                  |
| <i>Mrp145</i>        | Mitochondrial ribosomal protein L45                                                  |
| <i>Mrps10</i>        | mitochondrial ribosomal protein S10                                                  |
| <i>Mrps2</i>         | mitochondrial ribosomal protein S2                                                   |
| <i>Mrps31</i>        | mitochondrial ribosomal protein S31                                                  |
| <i>Msh2</i>          | mutS homolog 2 (E. coli)                                                             |
| <i>Ndufaf1</i>       | NADH dehydrogenase (ubiquinone) 1 alpha subcomplex, assembly factor 1                |
| <i>Nol5</i>          | nucleolar protein 5                                                                  |
| <i>Pex7</i>          | peroxisome biogenesis factor 7                                                       |
| <i>Pkd2</i>          | polycystic kidney disease 2                                                          |
| <i>Pla2g6</i>        | phospholipase A2, group VI                                                           |
| <i>Ppic</i>          | peptidylprolyl isomerase C                                                           |
| <i>Psm12</i>         | proteasome (prosome, macropain) 26S subunit, non-ATPase, 12                          |
| <i>Rab18</i>         | RAB18, member RAS oncogene family                                                    |
| <i>Rcn</i>           | reticulocalbin                                                                       |
| <i>Rmp-pending</i>   | RPB5-mediating protein                                                               |
| <i>Rnac-pending</i>  | RNA cyclase homolog                                                                  |
| <i>Rock2</i>         | Rho-associated coiled-coil forming kinase 2                                          |
| <i>Rpl22</i>         | ribosomal protein L22                                                                |
| <i>Sec23a</i>        | SEC23A (S. cerevisiae)                                                               |
| <i>Sfrs3</i>         | splicing factor, arginine/serine-rich 3 (SRp20)                                      |
| <i>Snx12</i>         | sorting nexin 12                                                                     |
| <i>Srcasm</i>        | Src activating and signaling molecule                                                |

|                  |                                                                                                                           |
|------------------|---------------------------------------------------------------------------------------------------------------------------|
| <i>Stam</i>      | signal transducing adaptor molecule (SH3 domain and ITAM motif) 1                                                         |
| <i>Stat1p1</i>   | signal transducer and activator of transcription interacting protein 1                                                    |
| <i>Stxbp3</i>    | syntaxin binding protein 3                                                                                                |
| <i>Suclg2</i>    | succinate-Coenzyme A ligase, GDP-forming, beta subunit                                                                    |
| <i>Tbrg1</i>     | transforming growth factor beta regulated gene 1                                                                          |
| <i>Tcp1-rs1</i>  | t-complex protein 1, related sequence 1                                                                                   |
| <i>Tead2</i>     | TEA domain family member 2                                                                                                |
| <i>Tex292</i>    | testis expressed gene 292                                                                                                 |
| <i>Tjp1</i>      | tight junction protein 1                                                                                                  |
| <i>Tmk</i>       | thymidylate kinase                                                                                                        |
| <i>Trip6</i>     | thyroid hormone receptor interactor 6                                                                                     |
| <i>Txn1</i>      | thioredoxin-like (32kD)                                                                                                   |
| <i>Txnrd1</i>    | thioredoxin reductase 1                                                                                                   |
| <i>Upp</i>       | uridine phosphorylase                                                                                                     |
| <i>Wbp5</i>      | WW domain binding protein 5                                                                                               |
| <i>Wig1</i>      | wild-type p53-induced gene 1                                                                                              |
| <i>Xrcc5</i>     | X-ray repair complementing defective repair in Chinese hamster cells 5                                                    |
| <i>Yes</i>       | Yamaguchi sarcoma viral (v-yes) oncogene homolog                                                                          |
| <i>Ywhab</i>     | tyrosine 3-monooxygenase/tryptophan 5-monooxygenase activation protein, beta polypeptide                                  |
| <i>Zfp54</i>     | zinc finger protein 54                                                                                                    |
| <i>Zfx</i>       | zinc finger protein X-linked                                                                                              |
| <i>LOC230737</i> | LOC230737: similar to Autoantigen NGP-1                                                                                   |
| <i>MGC27546</i>  | hypothetical protein MGC27546                                                                                             |
| <i>Mm.10509</i>  | UniGene: Mus musculus mRNA for zinc finger protein partial cds                                                            |
| <i>Mm.135092</i> | UniGene: ESTs, weakly similar to solute carrier family 4, sodium bicarbonate cotransporter-like, member 10 (Mus musculus) |
| <i>Mm.22363</i>  | UniGene: Mus musculus, clone MGC:28202<br>IMAGE:3989666, mRNA, complete cds                                               |
| <i>Mm.32505</i>  | UniGene: Mus musculus, Similar to zinc finger protein 281, clone MGC:7737 IMAGE:3498439, mRNA, complete cds               |
| <i>Mm.55092</i>  | UniGene: ESTs                                                                                                             |

---

<sup>a</sup> Ramalho-Santos, M., Yoon, S., Matsuzaki, Y., Mulligan, R.C. & Melton, D.A. "Stemness": transcriptional profiling of embryonic and adult stem cells. *Science* 298:597–600 (2002).

---

C. Functional annotation of “stemness” genes.

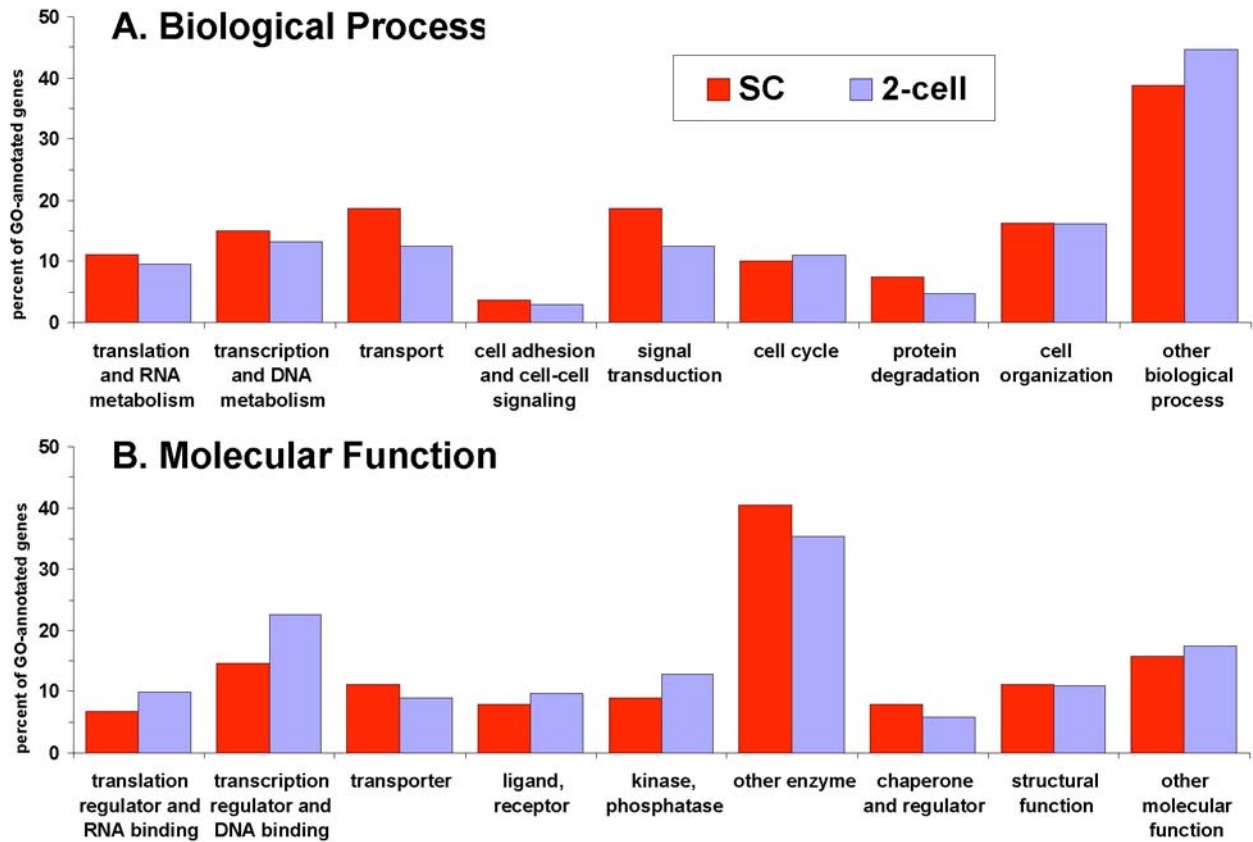

SC – stem cell genes; 2-cell – 2-cell embryo expressed genes. Current GO annotations for “stemness” genes were obtained from the MGI database and clustered using the same set of high-level terms (GO bins) as was used for the 2-cell transcriptome annotation.
